# Supplementary material
Source: PubMed Central journal article supplement (PMC5180609)
Supplement: NIHMS829446-supplement-Suppl_file.pdf [file NIHMS829446-supplement-Suppl_file.pdf]

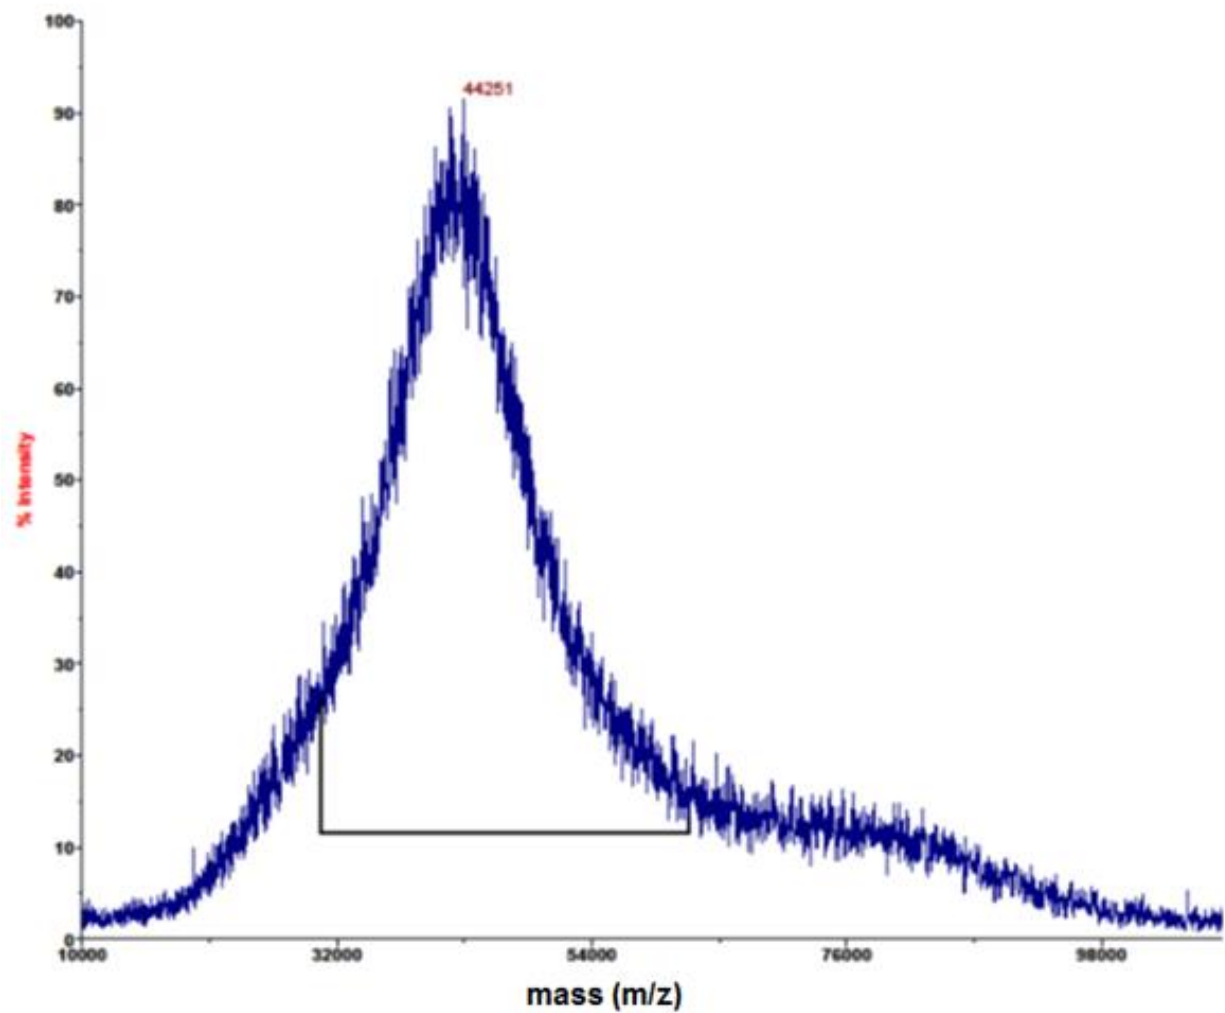

**Figure S1:** MALDI-TOF spectrum for molecular weight determination of  $(\text{GdDOTA})_{42}\text{-G4}$ . The average number of clinical relevant GdDOTA conjugated with G4 PAMAM dendrimer was estimated to be 42 per dendrimer.
